# Supplementary material
Source: Springer Nature journal article supplement (https://www.springermedizin.de/resource/supplementary/12879_2009_835_MOESM2_ESM.pdf/9449888)

m B O L m A A B O K B G R F m

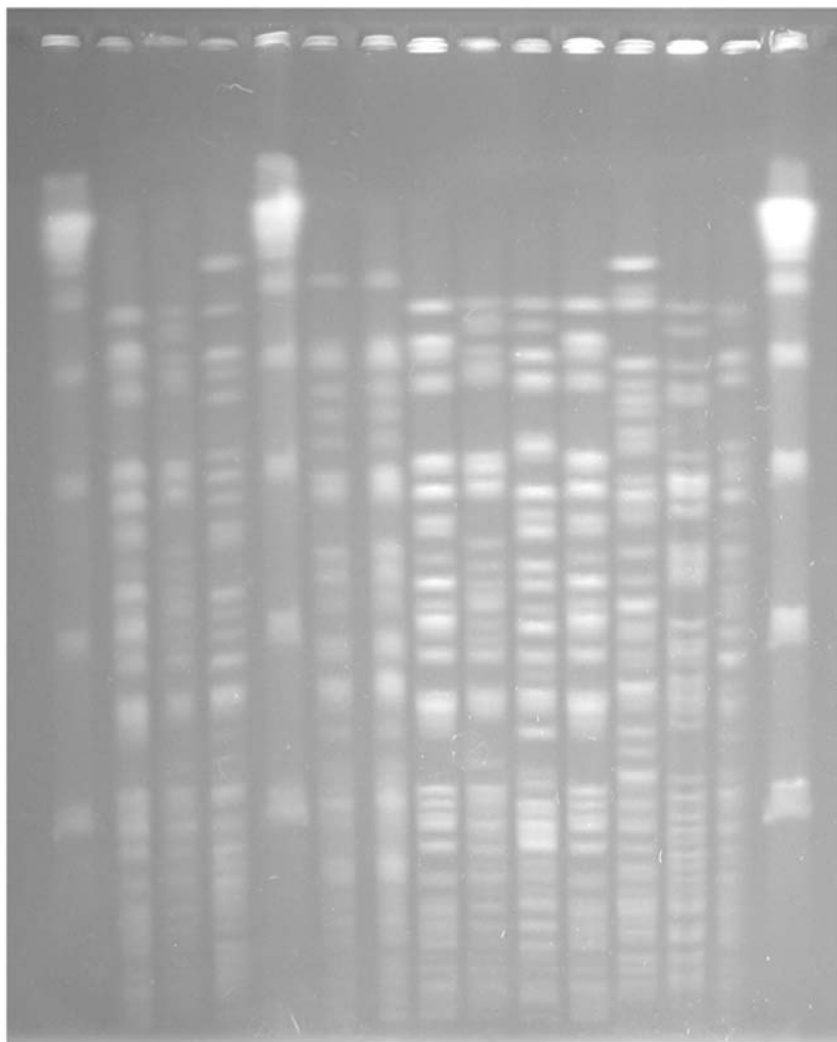

- 242.5 kb

- 194.0 kb

- 145.5 kb

- 97.0 kb

- 48.5 kb

Supplement: MOESM2 [file 9449888]
